# Supplementary material
Source: publisher figshare collection journal article supplement (https://tandf.figshare.com/ndownloader/files/17855615)
Supplement: Supplementary file 1 [file 17855615]

Supporting Information for

“Fabrication of magnetic zeolitic imidazolate framework-7 supported graphene oxide for the extraction of fungicides from environmental water and soil samples”


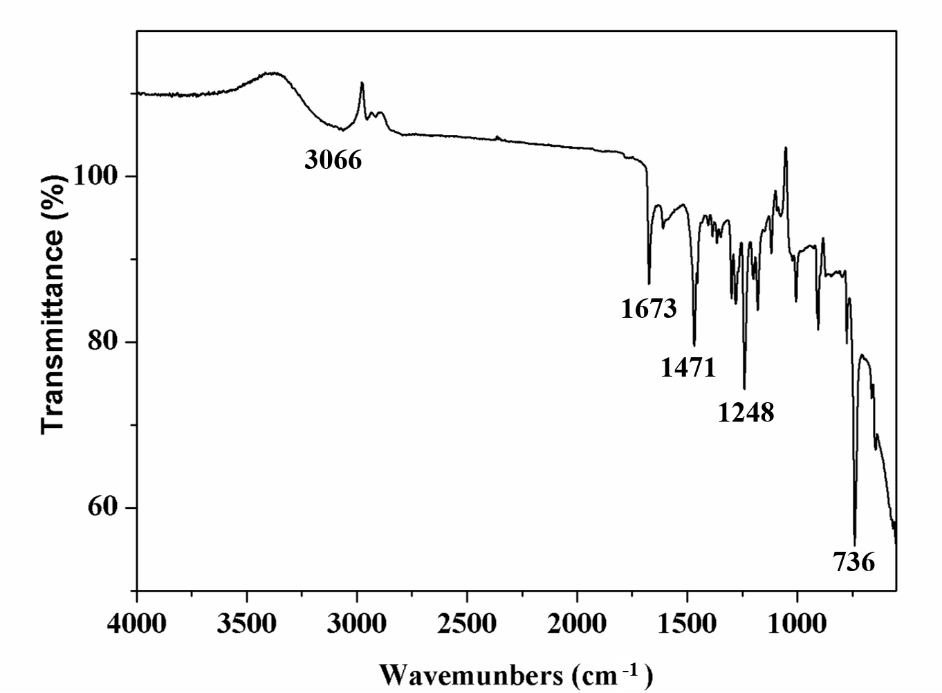


Figure S1. FT-IR spectrum of mag-ZIF-7@GO composite.


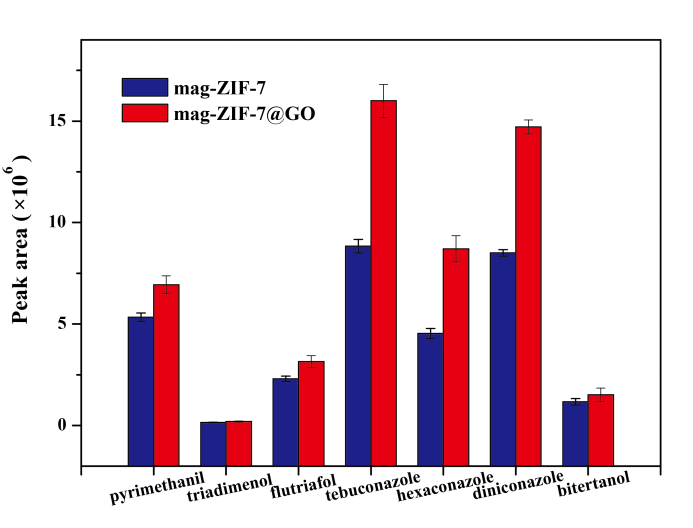


Figure S2. Extraction performances of mag-ZIF-7 and mag-ZIF-7@GO.


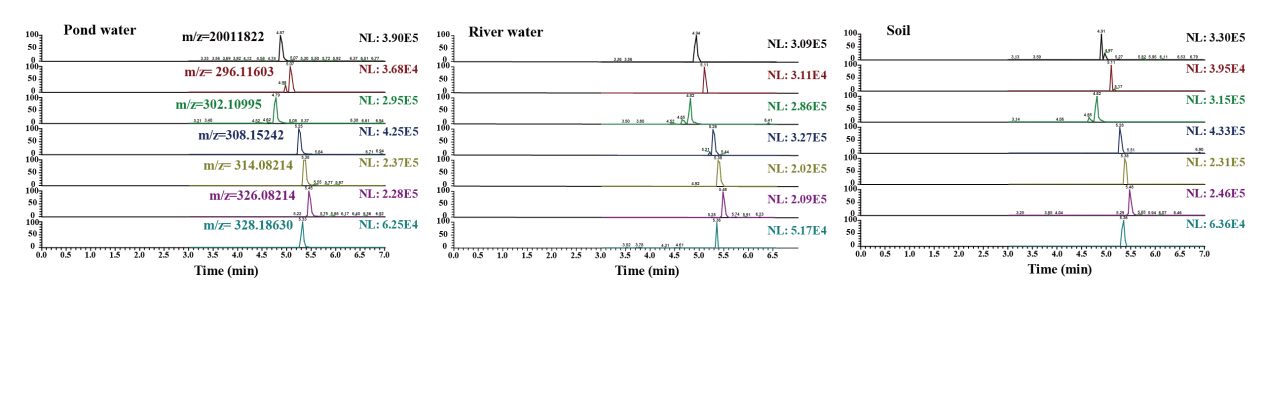


Figure S3. The mag-ZIF-7@GO MSPE-LC-MS chromatograms of spiked pond water, river water, and soil samples.

Table S1 Chemical structures and LC-MS parameters of the seven fungicides.

| Fungicides | Structural formula | Molecular formula | Precursor ion | Mass (m/z) | pKa (Su et al., 2016) | |
| --- | --- | --- | --- | --- | --- | --- |
| [pyrimethanil](javascript:showMsgDetail('ProductSynonyms.aspx?CBNumber=CB4473703&postData3=CN&SYMBOL_Type=A');) |  | C12H13N3 | [M+H]+ | 200.11822 | 10.59 | |
| triadimenol |  | C14H18ClN3O2 | [M+H]+ | 296.11603 | -a | |
| flutriafol |  | C16H13F2N3O | [M+H]+ | 302.10995 | - | |
| tebuconazole |  | C16H22ClN3O | [M+H]+ | 308.15242 | 13.7 | |
| [hexaconazole](javascript:showMsgDetail('ProductSynonyms.aspx?CBNumber=CB5427475&postData3=CN&SYMBOL_Type=A');) |  | C14H17Cl2N3O | [M+H]+ | 314.08214 | - | |
| diniconazole |  | C15H17Cl2N3O | [M+H]+ | 326.08214 | 12.89 | |
| bitertanol |  | C20H23N3O2 | [M+H]+ | 338.18630 | - |

a Not available

Su H., Lin Y., Wang Z., Wong Y.-L. E., Chen X., Chan T.-W. D., Magnetic metal-organic framework-titanium dioxide nanocomposite as adsorbent in the magnetic solid-phase extraction of fungicides from environmental water samples. J. Chromatogr. A 2016, 1466, 21–28.
